# Supplementary material for: Taxonomic and functional trait diversity of wild bees in different urban settings
Source: PeerJ. 2017 Mar 7;5:e3051. doi: 10.7717/peerj.3051 (PMC5344019; doi:10.7717/peerj.3051)
Supplement: Supplemental Information 1 [file peerj-05-3051-s001.xlsx]

## Sheet: Traits_database_Etienne.csv
Species	Nesting	ITD	Social	Pollen	Tongue	Lecty	Season
L.MICHIGANENSIS	cleptoparasite	1.4	Cleptoparasite	Accidental	medium	Polylectic	Spring
L.ISAWZUM	cleptoparasite	1.3	Cleptoparasite	Accidental	medium	Polylectic	summer
L.ASTERIS	cleptoparasite	1.05	Cleptoparasite	Accidental	medium	Polylectic	summer
L.SAGAX	excavator:ground	1.6	Solitary	Leg&body	medium	Polylectic	Spring:summer
L.LAEVISSIMUM	excavator:ground	1.42	Solitary	Leg&body	medium	Polylectic	Spring:summer
L.LEUCOCOMUM	excavator:ground	1.48	Solitary	Leg&body	medium	Polylectic	Spring:summer
L.LINEATULUM	excavator:ground	1.5	Solitary	Leg&body	medium	Polylectic	Spring:summer
L.CRESSONII	excavator:ground	2.15	Solitary	Leg&body	medium	Polylectic	Spring:summer
L.TEGULAREA	excavator:ground	0.98	Solitary	Leg&body	medium	Polylectic	Spring:summer
L.IMITATUM	excavator:ground	0.98	Solitary	Leg&body	medium	Polylectic	Spring:summer
L.EPHIALTUM	excavator:ground	1.5	Solitary	Leg&body	medium	Polylectic	Spring:summer
L.PILOSUM	excavator:ground	1.87	Solitary	Leg&body	medium	Polylectic	Spring:summer
L.VERSATUM	excavator:ground	1.9	Solitary	Leg&body	medium	Polylectic	Spring:summer
L.HITCHENSI	excavator:ground	1.56	Solitary	Leg&body	medium	Polylectic	Spring:summer
L.VERSANS	excavator:ground	1.61	Solitary	Leg&body	medium	Polylectic	Spring:summer
L.SUBVERSANS	excavator:ground	1.63	Solitary	Leg&body	medium	Polylectic	Spring:summer
L.NIGROVIRIDE	excavator:ground	1.91	Solitary	Leg&body	medium	Polylectic	Spring:summer
L.PERPUNCTATUM	excavator:ground	1.64	Solitary	Leg&body	medium	Polylectic	Spring:summer
L.PLANATUM	excavator:ground	1.05	Solitary	Leg&body	medium	Oligolectic	Spring:summer
L.DREISBACHI	excavator:ground	1.04	Solitary	Leg&body	medium	Oligolectic	Spring:summer
L.VIRIDATUM	excavator:ground	1.62	Solitary	Leg&body	medium	Polylectic	Spring
L.OBLONGUM	excavator:ground	1.65	Solitary	Leg&body	medium	Polylectic	Spring
L.TRIGEMINUM	excavator:ground	1.73	Solitary	Leg&body	medium	Oligolectic	Spring
L.SMILACINAE	excavator:ground	1.55	Solitary	Leg&body	medium	Polylectic	Spring
L.ZEPHYRUM	excavator:ground	1.45	Solitary	Leg&body	medium	Polylectic	Spring:summer
L.TAYLOREA	excavator:ground	1.43	Solitary	Leg&body	medium	Oligolectic	summer
L.TENAX	excavator:ground	1.03	Solitary	Leg&body	medium	Polylectic	Spring
L.COERULUM	excavator:ground	1.7	Solitary	Leg&body	medium	Polylectic	Spring
L.HETEROGNATUM	excavator:ground	1.2	Solitary	Leg&body	medium	Polylectic
L.PARADMIRANTUM	excavator:ground	1.43	Solitary	Leg&body	medium	Polylectic	Spring
L.ABANCI	excavator:ground	1.5	Solitary	Leg&body	medium	Polylectic	Spring:summer
L.CEPHALOTES	cleptoparasite	0.96	Cleptoparasite	Accidental	medium	Polylectic	Spring:summer
L.ATHABACENSE	excavator:ground	2.55	Solitary	Leg&body	medium	Polylectic	Spring:summer
L.CORIACEUM	excavator:ground	2.59	Solitary	Leg&body	medium	Polylectic	Spring:summer
L.OENOTHERAE	excavator:ground	1.59	Solitary	Leg&body	medium	Oligolectic	Spring:summer
L.CINCTIPES	excavator:ground	2.3	Solitary	Leg&body	medium	Polylectic	Spring:summer
L.QUEBECENSIS	excavator:ground	2.02	Solitary	Leg&body	medium	Polylectic	Spring:summer
L.COMAGENENSE	excavator:ground	1.63	Solitary	Leg&body	medium	Polylectic	Spring:summer
L.MACOUPINENSE	excavator:ground	1.67	Solitary	Leg&body	medium	Polylectic	Spring:summer
L.BIRKAMNNI	excavator:ground	1.61	Solitary	Leg&body	medium	Polylectic	Spring:summer
L.FOXII	excavator:ground	1.59	Solitary	Leg&body	medium	Polylectic	Spring:summer
L.INCONDIDUM	excavator:ground	1.73	Solitary	Leg&body	medium	Polylectic	Spring:summer
L.ZONULUM	excavator:ground	2.6	Solitary	Leg&body	medium	Polylectic	Spring:summer
L.LEUCOZONIUM	excavator:ground	2.57	Solitary	Leg&body	medium	Polylectic	Spring:summer
H.RUBICUNDUS	excavator:ground	3.14	Solitary	Leg&body	medium	Polylectic	Spring:summer
H.CONFUSUS	excavator:ground	1.89	Solitary	Leg&body	medium	Polylectic	Spring:summer
H.LIGATUS	excavator:ground	2.48	Solitary	Leg&body	medium	Polylectic	Spring:summer
A.AURATA	excavator:ground	2.05	Solitary	Leg&body	medium	Polylectic	Spring:summer
A.PURA	excavator:ground	2.55	Solitary	Leg&body	medium	Polylectic	Spring:summer
A.VIRESCENS	excavator:ground	3.39	Solitary	Leg&body	medium	Polylectic	Spring:summer
A.METALLICA	excavator:ground	2.6	Solitary	Leg&body	medium	Polylectic	Spring:summer
A.TEXANA	excavator:ground	2.73	Solitary	Leg&body	medium	Polylectic	Spring:summer
APIS.MELLIFERA	Renter:existingcavitiesbelowground	3.6	Highlyeusocial	Corbiculae	long	Polylectic	year
B.IMPATIENS	Renter:existingcavitiesbelowground	7.6	Highlyeusocial	Corbiculae	long	Polylectic	year
B.TERRICOLA	Renter:existingcavitiesbelowground	6.5	Highlyeusocial	Corbiculae	long	Polylectic	year
B.GRISEOCOLLIS	Renter:existingcavitiesbelowground	7.4	Highlyeusocial	Corbiculae	long	Polylectic	year
B.VAGANS	Renter:existingcavitiesbelowground	7.34	Highlyeusocial	Corbiculae	long	Polylectic	year
B.RUFOCINCTUS	Renter:existingcavitiesbelowground	6.37	Highlyeusocial	Corbiculae	long	Polylectic	year
B.TERNARIUS	Renter:existingcavitiesbelowground		Highlyeusocial	Corbiculae	long	Polylectic	year
B.BIMACULATUS	Renter:existingcavitiesbelowground	6.93	Highlyeusocial	Corbiculae	long	Polylectic	year
B.FERVIDUS	Renter:existingcavitiesbelowground	7	Highlyeusocial	Corbiculae	long	Polylectic	year
B.CITRINUS	Socialparasite	6.5	Socialparasite	Accidental	long	Polylectic	summer
B.PERPLEXUS	Renter:existingcavitiesbelowground		Highlyeusocial	Corbiculae	long	Polylectic	year
B.BOREALIS	Renter:existingcavitiesbelowground		Highlyeusocial	Corbiculae	long	Polylectic	year
M.DESPONSA	excavator:ground	4.05	Solitary	legsonly	long	Oligolectic	summer
M.TRINODIS	excavator:ground	3.3	Solitary	legsonly	long	Polylectic	summer
M.DRURIELLA	excavator:ground	3.26	Solitary	legsonly	long	Oligolectic	summer
M.ILLATA	excavator:ground	3.3	Solitary	legsonly	long	Polylectic	summer
M.SUBILLATA	excavator:ground	3.7	Solitary	legsonly	long	Polylectic	summer
P.PRUINOSA	excavator:ground	3.94	Solitary	legsonly	long	Oligolectic	summer
A.TERMINALIS	excavator:deadstem	3.04	Solitary	legsonly	long	Polylectic	summer
C.CALCARATA	excavator:deadstem	1.91	Solitary	legsonly	medium	Polylectic	year
C.MIKMAQUI	excavator:deadstem	1.81	Solitary	legsonly	medium	Polylectic	year
C.DUPLA	excavator:deadstem	1.2	Solitary	legsonly	medium	Polylectic	year
X.VIRGINIANA	excavator:deadstem	6.5	Solitary	legsonly	medium	Polylectic	summer
M.INERMIS	Renter:existingcavitiesaboveground	5.51	Solitary	underside:abdomen	medium	Polylectic	summer
M.FRIGIDA	Renter:existingcavitiesaboveground	3.46	Solitary	underside:abdomen	medium	Polylectic	summer
M.ROTUNDATA	Renter:existingcavitiesaboveground	2.27	Solitary	underside:abdomen	medium	Polylectic	Spring:summer
M.MELANOPHEA	excavator:ground	4.4	Solitary	underside:abdomen	medium	Polylectic	summer
M.PUGNATA	Renter:existingcavitiesaboveground	4.3	Solitary	underside:abdomen	medium	Polylectic	summer
M.CAMPANULAE	Renter:existingcavitiesaboveground	2.26	Solitary	underside:abdomen	medium	Polylectic	summer
M.CENTUNCULARIS	Renter:existingcavitiesaboveground	3.3	Solitary	underside:abdomen	medium	Polylectic	summer
M.RELATIVA	Renter:existingcavitiesaboveground	3.51	Solitary	underside:abdomen	medium	Polylectic	summer
M.LATIMANUS	excavator:ground	4.34	Solitary	underside:abdomen	medium	Polylectic	summer
M.GEMULA	Renter:existingcavitiesaboveground	4.38	Solitary	underside:abdomen	medium	Polylectic	summer
M.TEXANA	excavator:ground	3.56	Solitary	underside:abdomen	medium	Polylectic	summer
M.BREVIS	Renter:existingcavitiesaboveground	3.13
M.MENDICA	Renter:existingcavitiesaboveground	3.36	Solitary	underside:abdomen	medium	Polylectic	summer
M.LAPPONICA	Renter:existingcavitiesaboveground	3.11		underside:abdomen	medium	Polylectic	summer
A.MANICATUM	carder	4.13	Solitary	underside:abdomen	medium	Polylectic	summer
A.OBLONGATUM	carder	3.6	Solitary	underside:abdomen	medium	Polylectic	summer
A.FLORENTINUM	carder	4.95	Solitary	underside:abdomen	medium	Polylectic	summer
C.OCTODENTATA	cleptoparasite	2.87	Solitary	Accidental	medium	Polylectic	summer
C.PORTERAE	cleptoparasite	2.76	Solitary	Accidental	medium	Polylectic	summer
H.CARINATA	Renter:existingcavitiesaboveground	1.67	Solitary	underside:abdomen	medium	Polylectic	summer
H.PRODUCTA	Renter:existingcavitiesaboveground	2.1	Solitary	underside:abdomen	medium	Polylectic	summer
H.PILOSIFRONS	Renter:existingcavitiesaboveground	2.1	Solitary	underside:abdomen	medium	Polylectic	summer
H.SPOLIATA	Renter:existingcavitiesaboveground	3.15	Solitary	underside:abdomen	medium	Polylectic	summer
H.LEAVITTI	Renter:existingcavitiesaboveground	1.75	Solitary	underside:abdomen	medium	Polylectic	summer
H.ANTHOCOPOIDES	Renter:existingcavitiesaboveground	2.65	Solitary	underside:abdomen	medium	Polylectic	summer
O.ALBIVENTRIS	Renter:existingcavitiesaboveground	2.23	Solitary	underside:abdomen	medium	Polylectic	Spring:summer
O.ATRIVENTRIS	Renter:existingcavitiesaboveground	2.69	Solitary	underside:abdomen	medium	Polylectic	Spring:summer
O.CAERULESCENS	Renter:existingcavitiesaboveground	2.43	Solitary	underside:abdomen	medium	Polylectic	Spring:summer
O.TERSULA	Renter:existingcavitiesaboveground	2.73	Solitary	underside:abdomen	medium	Polylectic	summer
O.LIGNARIA	Renter:existingcavitiesaboveground	4.1	Solitary	underside:abdomen	medium	Polylectic	Spring
O.PUMILA	Renter:existingcavitiesaboveground	2.36	Solitary	underside:abdomen	medium	Polylectic	Spring:summer
O.TAURUS	Renter:existingcavitiesaboveground	3.47	Solitary	underside:abdomen	medium	Polylectic	Spring
O.CONJUNCTA	Renter:existingcavitiesaboveground	2.6	Solitary	underside:abdomen	medium	Polylectic	Spring:summer
O.SIMILLIMA	Renter:existingcavitiesaboveground	3.39	Solitary	underside:abdomen	medium	Polylectic	Spring:summer
O.BUCEPHALA	Renter:existingcavitiesaboveground	3.55	Solitary	underside:abdomen	medium	Polylectic	Spring:summer
C.RAPUNCULI	Renter:existingcavitiesaboveground	2.17	Solitary	underside:abdomen	medium	Polylectic	Spring:summer
C.PHILADELPHI	Renter:existingcavitiesaboveground	1.47	Solitary	underside:abdomen	medium	Polylectic	Spring:summer
C.CAMPANULARUM	Renter:existingcavitiesaboveground	1.03	Solitary	underside:abdomen	medium	Polylectic	Spring:summer
H.HYALINATUS	Renter:existingcavitiesaboveground	1.71	Solitary	Crop	short	Polylectic	summer
H.MESILLAE	Renter:existingcavitiesaboveground	1.86	Solitary	Crop	short	Polylectic	summer
H.AFFINIS	Renter:existingcavitiesaboveground	1.48	Solitary	Crop	short	Polylectic	summer
H.MODESTUS	Renter:existingcavitiesaboveground	1.65	Solitary	Crop	short	Polylectic	summer
H.ANNULATUS	Renter:existingcavitiesaboveground	1.2	Solitary	Crop	short	Polylectic	summer
H.BASALIS	Renter:existingcavitiesaboveground	2.45	Solitary	Crop	short	Polylectic	summer
H.PUNCTATUS	Renter:existingcavitiesaboveground	1.23	Solitary	Crop	short	Polylectic	summer
H.COMMUNIS	Renter:existingcavitiesaboveground	1.6	Solitary	Crop	short	Polylectic	summer
H.LEPTOCEPHALUS	Renter:existingcavitiesaboveground	1.05	Solitary	Crop	short	Polylectic	summer
H.NELUMBONIS	Renter:existingcavitiesaboveground	1.53	Solitary	Crop	short	Oligolectic	summer
C.SIMULANS	excavator:ground	2.55	Solitary	Leg&body	short	Oligolectic	summer
C.AMERICANA	excavator:ground	2.07	Solitary	Leg&body	short	Polylectic	summer
C.ANDRENIFORMIS	excavator:ground	1.98	Solitary	Leg&body	medium	Polylectic	summer
P.PARVUS	excavator:ground	1.73	Solitary	Leg&body	short	Polylectic	summer
P.RUDBECKIAE	excavator:ground	1.46	Solitary	Leg&body	short	Polylectic	summer
P.ANDRENOIDES	excavator:ground	1.56	Solitary	Leg&body	short	Polylectic	summer
P.OCTOMACULATA	excavator:ground	1.53	communal	Leg&body	short	Polylectic	summer
A.HIRTICINCTA	excavator:ground	2.55	Solitary	Leg&body	short	Oligolectic	summer
A.WHEELERI	excavator:ground	2.3	Solitary	Leg&body	short	Polylectic	Spring:summer
A.HIPPOTES	excavator:ground	2.87	Solitary	Leg&body	short	Polylectic	Spring:summer
A.CRESSONII	excavator:ground	2.72	Solitary	Leg&body	short	Polylectic	Spring
A.NIGRAE	excavator:ground	1.9	Solitary	Leg&body	short	Polylectic	Spring
A.NIVALIS	excavator:ground	2.75	Solitary	Leg&body	short	Polylectic	Spring
A.COMMODA	excavator:ground	4	Solitary	Leg&body	short	Polylectic	Spring:summer
A.CARLINI	excavator:ground	3.7	Solitary	Leg&body	short	Polylectic	Spring
A.CRATAGEI	excavator:ground	3.4	Solitary	Leg&body	short	Polylectic	year
A.MISERABILIS	excavator:ground	1.56	Solitary	Leg&body	short	Polylectic	Spring
A.MILWAUKIENSIS	excavator:ground	3.11	Solitary	Leg&body	short	Polylectic	Spring
A.VICINA	excavator:ground	3.35	Solitary	Leg&body	short	Polylectic	Spring
A.FRIGIDA*	excavator:ground	3.01	Solitary	Leg&body	short	Polylectic	Spring
A.PERPLEXA*	excavator:ground	3.2	Solitary	Leg&body	short	Polylectic	Spring
A.ZIZIEA	excavator:ground	2.3	Solitary	Leg&body	short	Oligolectic	Spring
A.MANDIBULARIS*	excavator:ground	2.17	Solitary	Leg&body	short	Polylectic	Spring:summer
A.GERANII	excavator:ground	2.66	Solitary	Leg&body	short	Oligolectic	Spring:summer
A.MORISONELLA	excavator:ground	2.93	Solitary	Leg&body	short	Polylectic	Spring:summer
A.ERYTHROGASTER	excavator:ground	2.75	Solitary	Leg&body	short	Oligolectic	Spring:summer
A.ERYTHRONII	excavator:ground	2.2	Solitary	Leg&body	short	Oligolectic
A.DUNNINGI	excavator:ground	2.51	Solitary	Leg&body	short	Polylectic	Spring
A.PERSIMULATA	excavator:ground	2.31	Solitary	Leg&body	short	Polylectic	Spring
A.RUGOSA	excavator:ground	3.28	Solitary	Leg&body	short	Polylectic	Spring:summer
A.FORBESII	excavator:ground	3	Solitary	Leg&body	short	Polylectic	Spring
A.NASSONI	excavator:ground	1.65	Solitary	Leg&body	short	Polylectic	Spring:summer
A.SPIREANA	excavator:ground	2.66	Solitary	Leg&body	short	Oligolectic	Spring:summer
A.BISALICIS	excavator:ground	2.52	Solitary	Leg&body	short	Polylectic	Spring:summer
A.ROBERTSONI	excavator:ground	1.69	Solitary	Leg&body	short	Polylectic	Spring:summer
A.WILKELLA	excavator:ground	2.95	Solitary	Leg&body	short	Polylectic	Spring:summer
A.CEANOTHI	excavator:ground	2.73	Solitary	Leg&body	short	Polylectic	Spring:summer
A.IMITATRIX	excavator:ground	1.6	Solitary	Leg&body	short	Polylectic	Spring:summer
A.INTEGRA	excavator:ground	2.52	Solitary	Leg&body	short	Polylectic	Spring:summer
A.CLARKELLA	excavator:ground	3.39	Solitary	Leg&body	short	Oligolectic	Spring
A.ALGIDA	excavator:ground	2.61	Solitary	Leg&body	short	Polylectic	summer
A.ALLEGHANIENSIS	excavator:ground	2.96	Solitary	Leg&body	short	Polylectic	Spring
A.CHROMOTRICHA	excavator:ground	2.69	Solitary	Leg&body	short	Polylectic	summer
A.ERIGENIAE*	excavator:ground	2.3	Solitary	Leg&body	short	Oligolectic	Spring
A.WSCRIPTA	excavator:ground	2.7	Solitary	Leg&body	short	Polylectic	Spring:summer
A.BREVIPALPIS	excavator:ground	2.53	Solitary	Leg&body	short	Polylectic	Spring:summer
A.NUBECULA	excavator:ground	1.95	Solitary	Leg&body	short	Oligolectic	summer
A.FRAGILIS	excavator:ground	2.5	Solitary	Leg&body	short	Oligolectic	Spring:summer
A.SIGMUNDI	excavator:ground	3.1	Solitary	Leg&body	short	Oligolectic	Spring:summer
A.PLATYPARIA	excavator:ground	1.6	Solitary	Leg&body	short	Oligolectic	summer
A.ASTERIS	excavator:ground	2.88	Solitary	Leg&body	short	Oligolectic	summer
A.DISTANS	excavator:ground	1.55	Solitary	Leg&body	short	Oligolectic	Spring
A.RUFOSIGNATA	excavator:ground	2.57	Solitary	Leg&body	short	Polylectic	Spring
A.REGULARIS	excavator:ground	3.53	Solitary	Leg&body	short	Polylectic	Spring:summer
A.SIMPLEX	excavator:ground	2.01	Solitary	Leg&body	short	Oligolectic	summer
N.BETHUNEI	cleptoparasite	2.8	Cleptoparasite	Accidental	short	Polylectic	Spring
N.CRESSONII	cleptoparasite	2.5	Cleptoparasite	Accidental	short	Polylectic	Spring
N.PYGMAEA	cleptoparasite	2.7	Cleptoparasite	Accidental	short	Polylectic	Spring
N.PARVA	cleptoparasite	2.02	Cleptoparasite	Accidental	short	Polylectic	Spring
N.MACULATA	cleptoparasite	3.05	Cleptoparasite	Accidental	short	Polylectic	Spring
N.DENTICULATA	cleptoparasite	2.3	Cleptoparasite	Accidental	short	Polylectic	Spring
N.LUTHEOLOIDES	cleptoparasite	3.1	Cleptoparasite	Accidental	short	Polylectic	Spring
N.VICINA	cleptoparasite	2.6	Cleptoparasite	Accidental	short	Polylectic	Spring
S.RANUNCULI	cleptoparasite	2.16	Cleptoparasite	Accidental	short	Polylectic	Spring
S.DICHROUS	cleptoparasite	2.7	Cleptoparasite	Accidental	short	Polylectic	Spring
S.MANDIBULARIS	cleptoparasite	1.5	Cleptoparasite	Accidental	short	Polylectic	Spring
S.SOLONIS	cleptoparasite	1.5	Cleptoparasite	Accidental	short	Polylectic	Spring
S.CLEMATIDIS	cleptoparasite	2.5	Cleptoparasite	Accidental	short	Polylectic	Spring
S.CONFERTUS	cleptoparasite	1.5	Cleptoparasite	Accidental	short	Polylectic	Spring
S.CRESSONI	cleptoparasite	1.2	Cleptoparasite	Accidental	short	Polylectic	Spring
S.CAROLINUS	cleptoparasite	1.6	Cleptoparasite	Accidental	short	Polylectic	Spring
T.OBLITERATUS	cleptoparasite	2.83	Cleptoparasite	Accidental	short	Polylectic	summer
T.REGIMENATUS	cleptoparasite	3.6	Cleptoparasite	Accidental	short	Polylectic	summer
E.SCUTELARIS	cleptoparasite	3.33	Cleptoparasite	Accidental	short	Polylectic	summer
M.NUDA	excavator:ground	2.7	Solitary	legsonly	medium	Oligolectic	Spring:summer
T.PECTORALIS	cleptoparasite	2.85	Cleptoparasite	Accidental	short	Polylectic	summer
H.CALLIOPSIDIS	cleptoparasite	1.25	Cleptoparasite	Accidental	short	Polylectic	summer
